# Supplementary material for: Homo- and Dikaryons of the Arbuscular Mycorrhizal Fungus Rhizophagus irregularis Differ in Life History Strategy
Source: Front Plant Sci. 2021 Aug 5;12:715377. doi: 10.3389/fpls.2021.715377 (PMC8374082; doi:10.3389/fpls.2021.715377)
Supplement: Supplementary file 2 [file Data_Sheet_2.xlsx]

## Sheet: Experiment 1
Strain	Karyosis	SD	SA	GT	HR	HD	TG	THL	BI	S	HGR	SG
229455(330)	Homokaryon	48.019	2056	1	779.449	3.99	10	660.584	0.00136243	0	20.9709	81.08
229455(330)	Homokaryon	78.976	5221.83	1	552.454	4.06	10	475.845	0.00189137	0	15.1062	81.08
229455(330)	Homokaryon	63.099	3396.91	1	1529.83	4.12	10	1998.62	0.00135093	0.000450311	63.4483	81.08
229455(330)	Homokaryon	54.106	2350.93	2	667.499	4.01	17	1198.58	0.00225266	0	47.5629	81.08
229455(330)	Homokaryon	69.271	4035.23	2	627.851	3.89	10	714.316	0.00251989	0	22.6767	81.08
229455(330)	Homokaryon	75	4574.34	3	732.842	4.04	17	1155.07	0.00233751	0	45.8363	81.08
229455(330)	Homokaryon	62.508	3082.56	1	1337.85	4.2	10	1137	0.000791558	0.00237467	36.0952	81.08
229455(330)	Homokaryon	61.035	3026.36	1	404.279	4.02	17	268.705	0.0033494	0	10.6629	81.08
229455(330)	Homokaryon	40.673	1296.01	2	723.877	3.12	10	596.591	0.00301714	0	18.9394	81.08
229455(330)	Homokaryon	50.001	2040.23	2	697.807	3.8	10	1044.8	0.00172281	0	33.1683	81.08
229455(330)	Homokaryon	49.816	2019.69	1	648.278	4.02	10	518.729	0.00173501	0	16.4676	81.08
229455(330)	Homokaryon	57.711	2813.91	3	642.166	3.98	10	1132.71	0.00238367	0.000794555	35.959	81.08
229455(330)	Homokaryon	62.866	3118.99	1	725.806	3.5	10	613.732	0.00146644	0.00146644	19.4835	81.08
229455(330)	Homokaryon	46.674	1759.63	3	1544.77	3.66	10	2655.37	0.00135574	0	84.2976	81.08
229455(330)	Homokaryon	43.293	1268.06	2	742.557	3.12	10	939.329	0.00191626	0	29.82	81.08
229455(330)	Homokaryon	49.828	2074.14	1	650.665	4.01	10	529.901	0.00169843	0	16.8223	81.08
229455(330)	Homokaryon	72.297	4234.77	1	1349.71	4.12	17	1165.76	0.000772031	0.00308813	46.2601	81.08
229455(330)	Homokaryon	58.381	2750.11	1	1738.03	4.56	17	1529.42	0.000588459	0.00176538	60.6912	81.08
229455(330)	Homokaryon	57.187	2541.09	2	3234.61	4.22	10	4060.67	0.000443276	0.00376785	128.91	81.08
229455(330)	Homokaryon	60.142	3056.69	2	2321.06	3.8	10	3116.42	0.000577586	0	98.934	81.08
229455(330)	Homokaryon	26.126	571.055	2	1551.61	3.14	10	2314.17	0.00155563	0	73.4657	81.08
229455(330)	Homokaryon	70.618	4200.26	2	3333.76	4.04	17	4103.28	0.000438674	0.000877347	162.828	81.08
229455(330)	Homokaryon	54.754	2557.82	1	1630.1	4.06	10	1745.79	0.00154658	0	55.4219	81.08
229455(330)	Homokaryon	63.851	3193.08	1	1524.29	4.08	17	1353.88	0.000664756	0	53.7254	81.08
229455(330)	Homokaryon	64.89	3325.27	2	1621.65	3.55	17	2571.9	0.00104981	0	102.06	81.08
229455(330)	Homokaryon	65.352	3289.16	3	914.65	3.01	10	2248.14	0.00200165	0.00240198	71.3696	81.08
229455(330)	Homokaryon	71.625	3930.4	8	1190.55	4.2	17	2316.93	0.0042729	0.00349601	91.9416	81.08
229455(330)	Homokaryon	51.095	1943.03	1	1057.68	4.1	10	1334.02	0.00134931	0.00809584	42.3498	81.08
229455(330)	Homokaryon	60.277	2659.5	2	912.857	4.2	17	1269.08	0.00141835	0	50.3602	81.08
229455(330)	Homokaryon	54.305	1928.38	1	453.352	3.89	17	390.734	0.00230336	0.0138201	15.5053	81.08
240720(66)	Homokaryon	58.325	2850.41	5	1704.57	3.6	4	3748.07	0.00120062	0.000960495	112.555	82.5
240720(66)	Homokaryon	75.481	4591.16	2	2033.42	3.67	4	4691.57	0.000959166	0.00153467	140.888	82.5
240720(66)	Homokaryon	55.452	2258.38	1	2882.61	5.22	4	2544.41	0.000353716	0.00353716	76.4088	82.5
240720(66)	Homokaryon	51.736	2102.38	3	1838.32	4.85	4	3912.34	0.00138025	0.00184033	117.488	82.5
240720(66)	Homokaryon	68.849	3763.91	2	2218.7	4.12	4	3706.98	0.000485571	0.00267064	111.321	82.5
240720(66)	Homokaryon	70.291	3890.17	3	1137.23	3.89	4	1226.33	0.00220169	0	36.8267	82.5
240720(66)	Homokaryon	61.214	2777.73	1	3168.7	5.2	4	3715.6	0.00145333	0.00363333	111.579	82.5
240720(66)	Homokaryon	55.191	2483.26	3	1343.12	4.45	4	1897.6	0.00142285	0	56.9849	82.5
240720(66)	Homokaryon	67.512	3763.71	2	1992.37	4.23	13	2907.74	0.00123807	0	115.387	82.5
240720(66)	Homokaryon	44.709	1625.88	2	2305.03	4.11	4	2883.56	0.000624229	0.00280903	86.5934	82.5
240720(66)	Homokaryon	79.39	4318.19	1	3560.73	4.12	4	4539.95	0.00059472	0.00475776	136.335	82.5
240720(66)	Homokaryon	53.555	2300.94	2	2332.64	3.98	4	3726.23	0.000483062	0.00289837	111.899	82.5
240720(66)	Homokaryon	52.57	2171.74	2	1992.92	4.33	4	2808.05	0.000641013	0.00608963	84.326	82.5
240720(66)	Homokaryon	49.388	1890.36	2	2530.84	4.12	4	2800.45	0.000642753	0.0102841	84.0977	82.5
240720(66)	Homokaryon	63.941	3307.77	2	1901.43	4.8	13	3971.54	0.00113306	0	157.601	82.5
240720(66)	Homokaryon	77.695	4360.04	3	2098.11	3.6	4	3309.77	0.000815766	0.00978919	99.3926	82.5
240720(66)	Homokaryon	52.693	2368	2	1065.77	4.23	13	988.829	0.00182033	0	39.2392	82.5
240720(66)	Homokaryon	79.492	4971.25	3	1431.54	4.11	4	2678.49	0.00235207	0	80.4351	82.5
240720(66)	Homokaryon	77.105	4801.22	2	2052.62	4	4	3004.38	0.000599125	0	90.2217	82.5
240720(66)	Homokaryon	85.269	5306.95	3	1949.24	4.11	4	5562.85	0.00064715	0.00145609	167.053	82.5
240720(66)	Homokaryon	87.438	6183.4	5	2075.89	4.05	13	6634.51	0.000949581	0	263.274	82.5
240720(66)	Homokaryon	53.022	2370.18	4	3258.31	4.12	6	6343.7	0.000993112	0.00170248	201.387	82.5
240720(66)	Homokaryon	74.314	4191.88	2	1001.45	4.05	4	2213.59	0.00162632	0	66.474	82.5
240720(66)	Homokaryon	78.446	4472.9	2	1340.31	3.89	13	2999.13	0.00090026	0	119.013	82.5
240720(66)	Homokaryon	90	6743.63	2	2859.09	4	4	3625.59	0.000496471	0.00744707	108.877	82.5
240720(66)	Homokaryon	47.437	1862.06	3	1273.18	4.12	4	3846.57	0.00140385	0	115.513	82.5
240720(66)	Homokaryon	48.417	1922.68	4	1885.54	4.23	4	4023.65	0.00111839	0	120.83	82.5
240720(66)	Homokaryon	55.065	2497.74	3	1839.24	3.98	4	4532.29	0.00119145	0	136.105	82.5
240720(66)	Homokaryon	70.911	4311.76	4	3458.91	4.5	4	4638.73	0.000970093	0.000776075	139.301	82.5
240720(66)	Homokaryon	72.708	3916.31	1	1645.34	4.11	13	2489.04	0.00108476	0	98.7713	82.5
240720(66)	Homokaryon	52.709	1906.24	3	6396.77	3.88	13	15782.7	0.000855369	0.00319338	626.296	82.5
240720(66)	Homokaryon	52.307	2226.12	2	3329.63	4.32	4	4495.61	0.000600586	0.00220215	135.003	82.5
240448(101-GC10)	Homokaryon	79.607	5112.65	3	3411.73	4.03	8	4214.32	0.00106779	0.000640672	126.556	85.29
240448(101-GC10)	Homokaryon	62.962	2745.89	2	4401.06	4.12	8	5064.25	0.000355433	0.00622007	152.08	85.29
240448(101-GC10)	Homokaryon	89.36	5674.41	4	2863.76	3.89	8	6047.25	0.000892968	0.00178594	181.599	85.29
240448(101-GC10)	Homokaryon	100.792	5312.47	5	1156.91	3.56	8	3189.35	0.00141094	0	95.7764	85.29
240448(101-GC10)	Homokaryon	69.09	3874.11	1	786.136	4.25	17	671.221	0.00134084	0	26.6358	85.29
240448(101-GC10)	Homokaryon	97.254	4685.29	2	3049.4	4.98	8	2865.07	0.000628258	0.00408368	86.038	85.29
240448(101-GC10)	Homokaryon	57.853	2657.2	1	220.918	4.14	24	59.733	0.015067	0	3.16048	85.29
240448(101-GC10)	Homokaryon	51.68	2161.99	1	279.459	4.81	8	192.739	0.00466954	0	5.78795	85.29
240448(101-GC10)	Homokaryon	76.697	4881.13	1	176.702	4.03	17	118.337	0.00760537	0	4.69593	85.29
240448(101-GC10)	Homokaryon	84.072	5256.9	4	592.152	3.58	10	1607.04	0.00280018	0	51.0171	85.29
240448(101-GC10)	Homokaryon	75.003	3976	2	1132.91	4.58	17	845.2	0.00212967	0.00851869	33.5397	85.29
240448(101-GC10)	Homokaryon	80.207	4142.62	3	1173.41	5.28	17	1178.09	0.00229185	0.0076395	46.7495	85.29
240448(101-GC10)	Homokaryon	65.516	3247.26	2	1280.2	4.66	17	1424.05	0.001264	0.004424	56.5099	85.29
240448(101-GC10)	Homokaryon	91.486	5230.29	4	1364.81	4.85	10	2673.12	0.00134674	0	84.8608	85.29
240448(101-GC10)	Homokaryon	102.74	7786.63	2	8400.97	4.65	10	8879.63	0.000405422	0.00597998	281.893	85.29
240448(101-GC10)	Homokaryon	77.153	5034.04	4	1924.26	3.99	10	4284.18	0.00105038	0.00504181	136.006	85.29
240448(101-GC10)	Homokaryon	91.991	6328.91	3	2407.94	4	10	4009.02	0.000897974	0.00269392	127.271	85.29
240448(101-GC10)	Homokaryon	86.988	5244.66	4	1213.79	5.49	10	2986.62	0.00120538	0.00180806	94.8134	85.29
240448(101-GC10)	Homokaryon	65.001	3394.19	4	1149.95	4.33	10	1809.44	0.00198957	0	57.4424	85.29
240448(101-GC10)	Homokaryon	72.132	3880.05	3	654.864	4.58	10	638.946	0.00422571	0	20.284	85.29
240448(101-GC10)	Homokaryon	68.883	3070.29	1	758.689	4.8	10	447.238	0.00201235	0	14.198	85.29
240448(101-GC10)	Homokaryon	53	2246.06	3	2328.56	4.22	17	3258.1	0.00138117	0	129.29	85.29
240448(101-GC10)	Homokaryon	81.992	5153.52	4	1414.7	3.99	10	1903.75	0.00189101	0	60.4364	85.29
197198	Homokaryon	118.769	9985.06	1	9485.66	4.25	11	9008.28	0.000299724	0.00319706	294.388	92.68
197198	Homokaryon	106.605	7720.57	2	8400.34	4.3	11	9811.38	0.000275191	0.00256845	320.633	92.68
197198	Homokaryon	108.614	9080.39	1	12323.1	3.9	11	12459.5	0.000433404	0.000866809	407.173	92.68
197198	Homokaryon	131.144	8319.32	2	7767.55	3.56	11	10578.8	0.000255227	0.00161644	345.713	92.68
197198	Homokaryon	112.28	9073.59	1	9936.84	5.25	11	16482.9	0.000436816	0.00294851	538.658	92.68
197198	Homokaryon	122.13	9231.74	1	7056.69	5.1	11	6260.58	0.000287513	0.00186884	204.594	92.68
197198	Homokaryon	93.939	6993.64	3	5759.28	4.7	11	11661.1	0.00023154	0.00370464	381.08	92.68
197198	Homokaryon	71.11	3817.52	1	3654.39	4.3	11	5300.65	0.000848952	0.0035656	173.224	92.68
197198	Homokaryon	69.357	3644.34	2	2987.33	5.98	11	3585.78	0.000752975	0.00677677	117.182	92.68
197198	Homokaryon	65.368	3223.54	2	3415.32	5.77	17	3323.05	0.00108334	0.0054167	131.867	92.68
197198	Homokaryon	68.356	3435.45	2	2040.24	5.6	11	2968.55	0.000909536	0.00333497	97.0113	92.68
197198	Homokaryon	119.71	10816.7	1	7995.88	4.88	11	11105.6	0.000243122	0.00291746	362.927	92.68
197198	Homokaryon	123.984	11155.6	3	7019.44	4.37	11	13198.3	0.000340953	0.000204572	431.317	92.68
197198	Homokaryon	217.199	31192.9	3	7647.38	4.12	11	7311.93	0.000492346	0.00135395	238.952	92.68
197198	Homokaryon	59.852	3051.68	4	2944.51	4.37	11	3391.54	0.00212293	0.000530732	110.835	92.68
197198	Homokaryon	62.572	2873.41	2	2684.24	4.12	11	2998.19	0.000600363	0.00240145	97.98	92.68
197198	Homokaryon	79.909	4838.87	4	3651.62	4.29	17	4069.62	0.000884603	0.00199036	161.493	92.68
197198	Homokaryon	123.819	11209.9	2	18222.6	4.28	11	20119.1	0.000536803	0.00156568	657.487	92.68
197198	Homokaryon	127.524	12160.6	1	12122.4	4.89	11	11929.4	0.000678994	0.00248965	389.85	92.68
197198	Homokaryon	58.978	2936.39	4	1484.38	5	17	2736.45	0.00131557	0.00131557	108.589	92.68
197198	Homokaryon	64.347	3295.9	3	2046.67	4.77	11	3133.11	0.000861763	0.00143627	102.389	92.68
197198	Homokaryon	77.54	4688.09	2	3105.56	4.6	11	3201.59	0.000562221	0.00927664	104.627	92.68
197198	Homokaryon	130.707	12493.3	1	11467.4	4.88	11	11110.9	0.000810013	0.00226803	363.103	92.68
197198	Homokaryon	155.219	15752.2	2	10475.5	5.04	11	13287.1	0.000541879	0.00392862	434.219	92.68
197198	Homokaryon	70.826	3752.69	2	2454.43	4.95	11	4568.47	0.000394005	0.00177302	149.296	92.68
197198	Homokaryon	101.71	8065.31	3	3618.95	5.12	11	16942.5	0.000637449	0.000637449	553.678	92.68
197198	Homokaryon	118.941	11053.1	3	5234.24	5.22	11	16659.7	0.000594247	0.000270112	544.436	92.68
197198	Homokaryon	56.439	2780	1	2757.86	5.6	11	3055.34	0.000589132	0.0026511	99.8478	92.68
197198	Homokaryon	104.989	7880.19	1	3278.92	5.49	11	3510.5	0.000769122	0.0146133	114.722	92.68
197198	Homokaryon	69.952	3794.38	2	2523.67	4.99	11	3291.26	0.000546903	0.0112115	107.558	92.68
197198	Homokaryon	116.337	10241.8	1	9636.42	4.25	11	8672.78	0.000518865	0.00985844	283.424	92.68
197198	Homokaryon	65.809	3161.09	2	3297.56	4.7	11	3361.18	0.000535525	0.00321315	109.843	92.68
197198	Homokaryon	103.116	7575.1	4	2181.26	5.2	11	4781.54	0.00094112	0.0103523	156.259	92.68
197198	Homokaryon	63.235	2849.48	2	2086	4.67	11	2756.93	0.00163225	0.00293806	90.0956	92.68
197198	Homokaryon	134.333	14106	2	6600.71	4.56	17	5940.64	0.000605996	0.00893844	235.74	92.68
197198	Homokaryon	106.213	8473.17	2	6418.98	4.78	11	5777.08	0.000467364	0.0115283	188.793	92.68
4401(98)	Homokaryon	82.542	4383.32	9	647.744	4.12	11	986.313	0.00821241	0.0109499	32.2324	64.86
4401(98)	Homokaryon	77.234	4437.73	2	352.495	4.22	11	373.476	0.00481959	0	12.2051	64.86
4401(98)	Homokaryon	71.596	3418.07	2	705.539	4.56	11	891.066	0.00303008	0.00909024	29.1198	64.86
4401(98)	Homokaryon	99.003	6421	2	278.201	3.7	11	352.657	0.00510411	0	11.5247	64.86
4401(98)	Homokaryon	100.748	7194.09	5	998.272	3.56	11	1055.56	0.00426312	0.00170525	34.4956	64.86
4401(98)	Homokaryon	85.116	5832.94	2	959.894	3.78	17	1307.65	0.00137651	0	51.8909	64.86
4401(98)	Homokaryon	82.664	4894.24	3	567.5	4.84	17	937.454	0.00288014	0.0172808	37.2006	64.86
4401(98)	Homokaryon	79.947	4669.61	3	277.584	3.89	17	103.173	0.0261696	0	4.09418	64.86
4401(98)	Homokaryon	86.797	5256.79	1	929.895	4.12	11	842.557	0.00106818	0.0213635	27.5345	64.86
4401(98)	Homokaryon	102.54	6367.19	2	364.474	4.5	17	329.573	0.00546162	0	13.0783	64.86
4401(98)	Homokaryon	122.75	8703.56	6	683.81	3.87	11	1060.4	0.00594118	0.00678992	34.6534	64.86
4401(98)	Homokaryon	69.68	3597.21	1	342.241	3.99	11	277.98	0.00323764	0	9.08432	64.86
4401(98)	Homokaryon	64.544	3223.68	1	176.595	4.1	11	150.081	0.00599675	0	4.90462	64.86
4401(98)	Homokaryon	98.623	6945.53	4	235.937	4.13	17	227.226	0.0158433	0	9.01689	64.86
4401(98)	Homokaryon	93.795	6380.53	2	1196.74	4.67	17	1433.2	0.00125593	0.0150712	56.8731	64.86
4401(98)	Homokaryon	95.834	6791.79	2	2364.05	3.95	11	1899.32	0.000947706	0.016111	62.0694	64.86
4401(98)	Homokaryon	82.542	5307.91	2	810.85	3.47	11	860.438	0.00209196	0	28.1189	64.86
4401(98)	Homokaryon	112.631	8323.12	3	1696.13	3.54	11	3349.71	0.000806039	0	109.468	64.86
4401(98)	Homokaryon	104.075	7680.27	3	2302	3.69	11	2277.76	0.00118537	0.00750737	74.4367	64.86
4401(98)	Homokaryon	109.23	8591.99	4	1031.19	3.87	11	1274.45	0.00282474	0	41.6488	64.86
4401(98)	Homokaryon	99.078	6719.17	3	1170.27	4.1	11	1083.85	0.00249113	0	35.4198	64.86
4401(98)	Homokaryon	76.83	4327.78	1	280.919	4.12	17	82.0638	0.0109671	0	3.2565	64.86
4401(98)	Homokaryon	76.318	4440.64	2	12126.5	3.87	11	12831	0.00077157	0.00505028	419.313	64.86
A5	Dikaryon	65.038	3145.98	2	2918.73	4.25	11	5623.09	0.000563392	0.0067607	125.292	55
A5	Dikaryon	117.409	6177.33	3	1397.58	3.98	17	3985.1	0.00158992	0.00516725	107.822	55
A5	Dikaryon	56.283	2397.28	2	1817.37	4.58	17	3296	0.000961166	0.00384466	89.1774	55
A5	Dikaryon	67.946	3574.93	1	2610.08	4.52	11	8905.22	0.00053362	0.00053362	198.423	55
A5	Dikaryon	77.312	3197.59	2	4316.11	4.5	11	10397.6	0.00121874	0.00258983	231.676	55
A5	Dikaryon	77.789	4372.97	2	6412.92	4.67	11	13046.9	0.00060704	0.0108053	290.706	55
A5	Dikaryon	84.131	3565.09	1	4781.04	3.65	11	7420.61	0.000640378	0.00811146	165.343	55
A5	Dikaryon	106.146	8622.32	3	2353.41	4.56	11	6134.94	0.00129097	0.00129097	136.696	55
A5	Dikaryon	102.966	6037.35	1	3241.41	4.23	17	4313.43	0.000367225	0.0143218	116.705	55
A5	Dikaryon	63.058	3223.93	1	4320.13	3.89	17	6306	0.000502379	0.0120571	170.617	55
A5	Dikaryon	60.78	2752.94	1	4479.9	4.85	11	9895.12	0.00112055	0.00448221	220.48	55
A5	Dikaryon	62.782	2984.47	2	2884.45	4.65	17	5109.89	0.000929962	0.0111595	138.255	55
A5	Dikaryon	114.28	8399.23	5	898.333	4.12	17	2100.49	0.00377054	0.00603286	56.8316	55
A5	Dikaryon	114.697	4104.77	1	4138.73	4.4	11	8517.06	0.000743918	0.00334763	189.774	55
A5	Dikaryon	50.285	1882.99	2	2516.63	4.31	11	5351.3	0.000888008	0.0118401	119.236	55
A5	Dikaryon	85.309	5900.16	4	1239.95	4.39	11	7914.65	0.00180122	0.00240162	176.351	55
A5	Dikaryon	116.769	7649.02	5	1501.73	4.87	17	6709.66	0.00141647	0.0042494	181.538	55
A5	Dikaryon	74.71	4567.15	1	955.19	4.59	17	1596.73	0.00198405	0	43.2016	55
A5	Dikaryon	96.62	7019.95	3	562.177	4.96	17	1291.04	0.00368076	0	34.9306	55
A5	Dikaryon	83.748	3852.63	3	3675.19	4.52	11	7191.33	0.000881062	0	160.235	55
A5	Dikaryon	92.904	5827.75	2	3058.73	4.12	11	12626.5	0.000752705	0	281.338	55
A4	Dikaryon	99.232	7283	3	6342.53	4.13	17	19657.4	0.000483481	0.00024174	531.857	54.55
A4	Dikaryon	86.682	5750.92	2	11900.3	4.23	10	24790.5	0.000319477	0	536.591	54.55
A4	Dikaryon	94.202	6893.92	2	1331.76	3.82	10	2960.48	0.00535049	0	64.0796	54.55
A4	Dikaryon	94.459	6925.97	2	13842.3	3.48	10	19477.4	0.00016265	0.00341565	421.588	54.55
A4	Dikaryon	132.191	13503.9	5	8805.12	4.13	10	28508.5	0.000777874	0.000444499	617.067	54.55
A4	Dikaryon	82.352	5058.86	1	9737.02	4.44	10	14788.4	0.000642667	0.00128533	320.094	54.55
A4	Dikaryon	86.174	5524.18	1	11077.7	3.98	10	16702.3	0.000379349	0.00341414	361.521	54.55
A4	Dikaryon	75.028	4675.9	2	737.071	4	17	1148.1	0.00275935	0	31.0632	54.55
A4	Dikaryon	118.727	10190.2	1	10163.3	4.52	10	13853.3	0.000343022	0.00171511	299.855	54.55
A4	Dikaryon	44.613	1544.39	1	2847.49	3.88	17	3687.76	0.000429529	0.00773152	99.7771	54.55
A4	Dikaryon	87.746	5476.1	2	7361.88	3.99	10	11748.9	0.000269642	0	254.305	54.55
A4	Dikaryon	94.515	6586.27	2	1136.42	4.55	10	2368.58	0.00133751	0	51.2681	54.55
A4	Dikaryon	78.591	4517.56	3	5171.01	3.26	10	15314.6	0.000310292	0.00568869	331.485	54.55
A4	Dikaryon	50.962	2083.95	2	3930.04	3.02	10	10142.3	0.0014056	0	219.53	54.55
A4	Dikaryon	97.111	6679.99	1	12943.2	4.12	17	19088.2	0.000663865	0	516.456	54.55
A4	Dikaryon	107.656	8752.81	2	7405.76	4.43	17	19550	0.000324092	0	528.949	54.55
A4	Dikaryon	97.402	7225.14	3	7456.27	4.6	10	21838.3	0.000507732	0.000290132	472.691	54.55
SL1	Dikaryon	45.209	1532.52	4	2113.09	4.45	8	5553.63	0.00114088	0.00228175	113.711	41.18
SL1	Dikaryon	59.905	2802.22	5	2900.21	4.26	17	6941.31	0.001141	0.00136919	187.806	41.18
SL1	Dikaryon	89.865	6216.57	4	1135.2	3.4	17	4791.63	0.0013223	0	129.644	41.18
SL1	Dikaryon	78.262	4568.97	3	3082.91	3.98	8	12445.4	0.000509104	0.000636379	254.82	41.18
SL1	Dikaryon	56.667	2478.86	4	2635.91	4.33	17	7157.04	0.00132792	0.00354113	193.643	41.18
SL1	Dikaryon	46.451	1726.88	5	1192.36	3.56	17	4891.88	0.00161901	0.00259042	132.356	41.18
SL1	Dikaryon	50.666	2048.82	1	2643.01	3.98	8	5056.26	0.00062655	0.0037593	103.527	41.18
SL1	Dikaryon	65.471	3419.93	1	5401.42	3.25	17	8694.3	0.000728754	0.000728754	235.235	41.18
SL1	Dikaryon	70.195	3744.13	4	5487.83	4.66	17	47410.6	0.000634795	0.000300692	1282.75	41.18
SL1	Dikaryon	56.397	2543.2	2	1145.57	4.43	17	1804.83	0.00789879	0	48.8321	41.18
SL1	Dikaryon	67.965	3410.28	3	497.611	4.75	17	3905.66	0.0012167	0.00283896	105.672	41.18
SL1	Dikaryon	76.218	4419.79	3	1887.31	4.56	17	8537.2	0.00166987	0.00222649	230.985	41.18
G1(4350)	Dikaryon	80.721	5397.23	3	1874.99	4.23	5	9056.36	0.00104943	0.000174905	185.429	69.22
G1(4350)	Dikaryon	63.988	2868.07	3	2815.54	4.36	14	7983.59	0.00158726	0	216.006	69.22
G1(4350)	Dikaryon	66.381	3336.65	2	2550.59	4.89	14	4826.36	0.00131279	0	130.583	69.22
G1(4350)	Dikaryon	65.904	3076.64	5	3995.64	4.25	14	9103.2	0.00208806	0.000870024	246.299	69.22
G1(4350)	Dikaryon	96.674	5511.4	1	1477.75	4.17	5	2130.96	0.00148665	0.00668993	43.6315	69.22
G1(4350)	Dikaryon	61.184	3116.13	1	163.98	5.03	14	325.764	0.00486241	0	8.81396	69.22
G1(4350)	Dikaryon	67.603	3522.16	2	700.243	4.44	14	1265.09	0.00250417	0	34.2287	69.22
G1(4350)	Dikaryon	62.739	3123.49	1	644.65	5.01	5	768.821	0.0020603	0	15.7416	69.22
G1(4350)	Dikaryon	80.925	4985.31	1	2533.3	3.98	5	3797.85	0.00125124	0.00500494	77.761	69.22
G1(4350)	Dikaryon	132.333	7910.2	5	1394.8	3.25	14	3941.36	0.00200946	0.00602837	106.639	69.22
G1(4350)	Dikaryon	91.874	6202.58	3	1629.12	4.42	14	2738.27	0.00289234	0.00289234	74.0874	69.22
G1(4350)	Dikaryon	170.555	8732.52	4	1354.73	4.12	5	4440	0.0024973	0.000356756	90.9091	69.22
G1(4350)	Dikaryon	77.215	4201.13	5	3130.9	4.01	14	6647.49	0.00142971	0.00452742	179.856	69.22
G1(4350)	Dikaryon	105.316	5989.65	2	971.919	4.65	21	2028.59	0.00234251	0	73.1814	69.22
G1(4350)	Dikaryon	85.613	5783.95	4	1026.45	4.25	14	3723.06	0.00170183	0	100.732	69.22
G1(4350)	Dikaryon	88.132	5129.74	1	1968.34	3.89	14	3407.13	0.00278944	0.000929814	92.1843	69.22
G1(4350)	Dikaryon	79.942	4576.5	3	1422.18	4.74	14	4256.23	0.0018608	0	115.158	69.22
G1(4350)	Dikaryon	67.486	2785.11	4	1504.38	4.6	14	4850.64	0.00163277	0.000979663	131.24	69.22
G1(4350)	Dikaryon	93.206	6078.36	3	2033.19	3.98	5	7402.22	0.000855959	0.000641969	151.561	69.22
G1(4350)	Dikaryon	61.193	2795.79	7	1528.34	4.23	14	6094.02	0.00415883	0.00077978	164.882	69.22
G1(4350)	Dikaryon	95.062	6326.25	4	1658.11	3.88	21	3291.48	0.0033687	0.00577491	118.74	69.22
G1(4350)	Dikaryon	65.805	2986.87	5	1383.78	4.22	14	5544.43	0.0034283	0.00114277	150.012	69.22
G1(4350)	Dikaryon	82.69	5528.58	5	923.454	3.33	5	4584.07	0.00276436	0	93.8589	69.22
G1(4350)	Dikaryon	93.678	6911.34	2	1433.87	4.56	14	3440.22	0.00138131	0.00322305	93.0796	69.22
G1(4350)	Dikaryon	90.003	5829.94	2	1287.64	5.1	14	2493.85	0.00127032	0.00127032	67.4744	69.22

## Sheet: Experiment_2
REP	STRAIN	KAR	HOST	DERM	HSPEED	TSPOR	SPORES	HL	BF	ND
1	A5	Dik	Carrot	42	7500	12	6412	12570412	0.113	34923
2	A5	Dik	Carrot	13	7500	27	5251	13682544	0.135	44074
3	A5	Dik	Carrot	9	7500	34	4873	10899623	0.122	43776
4	A5	Dik	Carrot	17	7500	25	5986	11310002	0.126	44504
5	A5	Dik	Carrot	17	7500	27	5487	12741698	0.137	38779
6	A5	Dik	Carrot	21	7500	31	4786	9856333	0.114	35845
1	A5	Dik	Nicotiana	13	0	0	0	0	0	0
2	A5	Dik	Nicotiana	8	5000	33	8	52000	0	0
3	A5	Dik	Nicotiana	8	3333.33	43	5	47054	0	0
4	A5	Dik	Nicotiana	51	0	0	0	0	0	0
5	A5	Dik	Nicotiana	25	0	0	0	0	0	0
1	A5	Dik	Chicory	21	10000	46	899	3.04587e+06	0.073	18475
2	A5	Dik	Chicory	21	7500	34	2014	4.58712e+06	0.085	20145
3	A5	Dik	Chicory	25	7500	48	150	1.39533e+06	0.047	17554
4	A5	Dik	Chicory	31	7500	66	1954	4.21479e+06	0.089	19122
5	A5	Dik	Chicory	51	10000	16	211	1.52412e+06	0.054	16444
1	A4	Dik	Carrot	16	4285.71	52	1810	12321000	0.147	43284
2	A4	Dik	Carrot	18	6000	46	4005	16844600	0.166	47382
3	A4	Dik	Carrot	23	7500	26	3899	14110000	0.156	47084
4	A4	Dik	Carrot	45	10000	19	6577	14698366	0.142	37816
5	A4	Dik	Carrot	45	7500	34	5960	12033211	0.147	38390
1	A4	Dik	Nicotiana	14	0	0	0	0	0	0
3	A4	Dik	Nicotiana	17	0	0	0	0	0	0
5	A4	Dik	Nicotiana	16	0	0	0	0	0	0
1	A4	Dik	Chicory	10	4285.71	49	89	559709	0.041	12445
2	A4	Dik	Chicory	21	7500	46	421	1.30269e+06	0.058	17054
3	A4	Dik	Chicory	27	5000	52	40	784255	0.044	15441
4	A4	Dik	Chicory	26	7500	46	69	1.02416e+06	0.052	16988
2	SL1	Dik	Carrot	14	7500	47	111	9605400	0.158	52046
3	SL1	Dik	Carrot	14	6000	60	10154	12666300	0.177	57070
4	SL1	Dik	Carrot	14	7500	28	6810	12040000	0.157	45186
5	SL1	Dik	Carrot	35	6000	37	10441	13784000	0.153	45684
7	SL1	Dik	Carrot	22	7500	27	984	11236000	0.163	51201
6	SL1	Dik	Carrot	15	10000	41	9544	10745000	0.159	52633
1	SL1	Dik	Nicotiana	12	0	0	0	0	0	0
2	SL1	Dik	Nicotiana	25	0	30	7	0	0	0
4	SL1	Dik	Nicotiana	28	0	26	5	0	0	0
5	SL1	Dik	Nicotiana	79	0	0	0	0	0	0
1	SL1	Dik	Chicory	10	3750	36	4587	1.15019e+07	0.178	34511
2	SL1	Dik	Chicory	10	7500	42	3544	6544311	0.111	33154
3	SL1	Dik	Chicory	10	7500	32	6051	1.24666e+07	0.182	33988
4	SL1	Dik	Chicory	31	6000	49	2644	10544200	0.113	40244
5	SL1	Dik	Chicory	12	7500	23	177	9980000	0.1887	39415
1	G1	Dik	Carrot	14	15000	57	7451	9541000	0.137	38437
2	G1	Dik	Carrot	14	6000	37	12744	14520000	0.15	40902
3	G1	Dik	Carrot	14	6000	49	10079	12620000	0.137	38322
4	G1	Dik	Carrot	14	15000	42	10244	11423000	0.148	39676
5	G1	Dik	Carrot	14	15000	53	1044	6512000	0.113	20654
6	G1	Dik	Carrot	14	7500	21	9368	10955000	0.138	39571
8	G1	Dik	Carrot	24	10000	7	6987	7658000	0.116	29574
1	G1	Dik	Nicotiana	12	0	0	0	0	0	0
3	G1	Dik	Nicotiana	14	625	0	7	0	0	0
4	G1	Dik	Nicotiana	14	833.333	0	2	0	0	0
5	G1	Dik	Nicotiana	20	0	0	0	0	0	0
1	G1	Dik	Chicory	14	7500	40	2540	4.92302e+06	0.075	24877
2	G1	Dik	Chicory	21	3000	42	3145	7645000	0.072	21643
3	G1	Dik	Chicory	21	6000	26	2002	7933400	0.055	18479
4	G1	Dik	Chicory	33	10000	26	865	2741000	0.042	14569
5	G1	Dik	Chicory	66	5000	4	287	2115345	0.061	23745
1	330	Hom	Carrot	4	7500	51	4871	9451300	0.094	35145
2	330	Hom	Carrot	11	4285.71	67	764	4.97902e+06	0.051	18454
3	330	Hom	Carrot	35	5000	32	617	5479612	0.061	23686
4	330	Hom	Carrot	27	5000	18	501	4.0327e+06	0.048	15569
5	330	Hom	Carrot	37	6000	28	89	1457963	0.045	16896
6	330	Hom	Carrot	7	7500	42	467	1756174	0.05	17568
1	330	Hom	Nicotiana	16	0	0	0	0	0	0
2	330	Hom	Nicotiana	20	0	0	0	0	0	0
3	330	Hom	Nicotiana	23	0	0	0	0	0	0
4	330	Hom	Nicotiana	23	0	0	0	0	0	0
5	330	Hom	Nicotiana	47	0	0	0	0	0	0
1	330	Hom	Chicory	16	3750	28	89	1.20385e+06	0.029	13950
3	330	Hom	Chicory	26	3750	23	212	890471	0.026	12479
4	330	Hom	Chicory	47	2727.27	5	114	1.76396e+06	0.049	15841
1	66	Hom	Carrot	24	6000	28	3744	9.57046e+06	0.12	35446
2	66	Hom	Carrot	24	5000	24	4960	12033211	0.129	38244
3	66	Hom	Carrot	8	3750	54	2130	7694233	0.126	39948
4	66	Hom	Carrot	11	5000	50	698	1.02416e+06	0.12	35586
5	66	Hom	Carrot	25	4285.71	32	4187	8465311	0.128	30544
1	66	Hom	Nicotiana	11	0	54	0	0	0	0
3	66	Hom	Nicotiana	14	0	35	0	0	0	0
4	66	Hom	Nicotiana	14	0	36	0	0	0	0
5	66	Hom	Nicotiana	14	0	53	0	0	0	0
1	66	Hom	Chicory	9	6000	21	4115	6312411	0.113	21654
2	66	Hom	Chicory	11	3750	60	84	875311	0.022	11450
3	66	Hom	Chicory	14	6000	42	841	1476311	0.037	12005
4	66	Hom	Chicory	18	0	0	0	0	0	0
5	66	Hom	Chicory	18	7500	42	67	840241	0.029	13540
2	197198	Hom	Carrot	14	7500	49	9523	7895622	0.104	28343
3	197198	Hom	Carrot	16	7500	58	5698	5.2113e+06	0.093	29333
4	197198	Hom	Carrot	16	7500	57	6939	6.08388e+06	0.092	29991
5	197198	Hom	Carrot	28	10000	22	1589	4.96523e+06	0.107	30012
2	197198	Hom	Nicotiana	11	0	0	0	0	0	0
3	197198	Hom	Nicotiana	11	0	0	0	0	0	0
4	197198	Hom	Nicotiana	41	0	0	0	0	0	0
1	197198	Hom	Chicory	11	7500	52	3	29682.2	0	0
2	197198	Hom	Chicory	42	10000	8	28	35789.5	0.023	10321
3	197198	Hom	Chicory	45	7500	13	18	17587.3	0	0
4	197198	Hom	Chicory	63	6000	1	19	20547.6	0	0
1	101	Hom	Carrot	14	7500	60	899	9853142	0.098	25493
2	101	Hom	Carrot	23	4285.71	29	5261	10230000	0.129	32980
3	101	Hom	Carrot	50	5000	24	2145	10239214	0.122	31464
4	101	Hom	Carrot	50	3750	23	544	9963500	0.108	27388
6	101	Hom	Carrot	34	4285.71	18	985	10405000	0.301	33302
1	101	Hom	Nicotiana	28	0	0	0	0	0	0
2	101	Hom	Nicotiana	30	0	0	0	0	0	0
3	101	Hom	Nicotiana	50	0	0	0	0	0	0
5	101	Hom	Nicotiana	34	0	0	0	0	0	0
1	101	Hom	Chicory	18	2142.86	14	18	557710	0.037	12654
2	101	Hom	Chicory	32	4285.71	64	7	34987.1	0.015	10454
4	101	Hom	Chicory	31	3333.33	19	864	1.45512e+06	0.066	19473
5	101	Hom	Chicory	20	3750	24	1745	1796522	0.099	27451
